## Multiple Sex Chromosome Drivers in a Mammal with Three Sex Chromosomes

Paul A. Saunders<sup>1</sup>, Julie Perez<sup>1</sup>, Ophélie Ronce<sup>1,\*</sup>, Frédéric Veyrunes<sup>1,\*</sup>

<sup>1</sup> Institut des Sciences de l'Evolution de Montpellier, UMR 5554, CNRS, Université de Montpellier, IRD, EPHE, 34090 Montpellier, France.

\*Equal contribution

Corresponding author: Paul A. Saunders

Email: paul.alan.saunders@gmail.com

### Abstract

A few mammals have unusual sex determining systems whereby fertile XY females live alongside XX females and XY males. These systems are regarded as evolutionary paradoxes because of the production of sex-reversed individuals and non-viable embryos, but they nevertheless seem stable over evolutionary time. Several hypotheses have been proposed to account for their stability, including models involving sex chromosome drive (*i.e.*, biased transmission of sex chromosomes to the next generation). Here we corroborate this hypothesis in *Mus minutoides*, a close relative of the house mouse in which the presence of XY females is due to the evolution of a third sex chromosome: a feminizing X. Through extensive molecular sexing of pups at weaning, we reveal the existence of a remarkable male sex chromosome drive system in this species, whereby direction and strength of drive is conditional upon the genotype of males' partners: males transmit their Y to almost 80% of their offspring when mating with XX females, and only 36% when mating with XY females. Using mathematical modelling, we explore the joint evolution of these unusual sex-determining and drive systems, revealing that different sequences of events could have led to the evolution of this bizarre system, and that the "conditional" nature of sex chromosome drive stabilizes the feminizing X, and even precludes a return to a standard XX/XY system.

**Keywords:** Sex determination, sex chromosomes, genetic conflicts, sex chromosome drive

## 1 **Introduction**

2 In therian mammals, sex is determined at fertilization by the X and Y chromosomes.  
3 This sex determining system evolved around 150my ago, making it one the oldest and most  
4 conserved sex determining systems known to date (1, 2). Nevertheless, a dozen mammalian  
5 species have been described with so-called unusual sex determining systems (3, 4). Among  
6 those, there are species in which fertile XY females live alongside the standard XX females and  
7 XY male. Naturally occurring XY sex-reversal has evolved at least five times independently:  
8 twice in lemmings, in the wood and collared lemmings *Myopus schisticolor* and *Dicrostonyx*  
9 *torquatus* (5, 6), in several species of South American field mice of the genus *Akodon* (7, 8), in  
10 the African pygmy mouse *Mus minutoides* (9), and in the Mandarin vole *Lasiopodomys*  
11 *mandarinus* (10, 11). In all these rodents, sex-reversal is due to a feminizing mutation on the  
12 X, rather than a loss of function of the Y. The feminizing X, generally called X\*, leads to the  
13 co-existence of three female karyotypes: XX, XX\* and X\*Y, while all males are XY.

14 The evolution and maintenance of these sex determining systems (that we will refer to  
15 as polygenic systems, following (12)) has puzzled scientists for decades. In human, laboratory  
16 mice and domestic animals, male-to-female sex-reversal usually leads to a strong decrease in  
17 fertility (13), due to (i) the loss of YY embryos and (ii) the presence of a single X chromosome  
18 and the ectopic expression of Y-linked genes during meiosis, leading to increased oocyte loss  
19 (14–17). Nevertheless, in the species mentioned above, X\*Y females tend to be found in high  
20 proportion (9, 18, 19). As it turns out, the monitoring of specimens in laboratory colonies  
21 revealed that the reproductive success of X\*Y females is not significantly lower than that of  
22 XX and XX\* females in the collared lemming (3, 20) and the South American field mouse  
23 *Akodon azarae* (21, 22), and that in the wood lemming and African pygmy mouse, X\*Y females  
24 actually display enhanced breeding performances (23–25). In all cases, this absence of reduced  
25 fertility is at least in part due an increased ovulation rate (20, 21, 24, 26). Though it is easy to  
26 understand how this helps maintaining the feminizing chromosomes nowadays, it is likely that  
27 these features evolved secondarily, and that X\*Y females had initially had a reduced fertility,  
28 in which case other mechanisms must have been responsible for the initial spread and  
29 maintenance of X\* chromosomes.

30 These species share another remarkable feature, that is extremely rare among animals:  
31 sex chromosome drive. Sex chromosome drive, also called transmission distortion of sex  
32 chromosomes, is caused by selfish genetic elements that manipulate the production/function of  
33 gametes, or embryo survival, to increase their own transmission to the next generation (27–29).  
34 They have only been described in a handful of species, and are rare because of their effect on  
35 sex ratio (30). So far, sex chromosome drive has been described in four out of the five lineages  
36 with X\* feminizing chromosomes. In *M. schisticolor* and *A. azarae*, X\*Y females transmit their  
37 X\* chromosome preferentially (X\*-drive) (5, 31). It was demonstrated mathematically that this  
38 helps maintaining the X\*, by increasing the frequency of the X\* in the offspring of X\*Y  
39 females, and reducing the proportion of YY embryos produced (32). Another type of drive *i.e.*,  
40 male Y-drive, was identified in *D. torquatus* (33) and is suspected in *A. azarae* (31). Such  
41 drivers are expected to evolve in species with X\*Y females, because they allow males to sire  
42 more sons on average, which represents an advantage as male is the rarer sex in the presence  
43 of an X\* (34). Nevertheless, mathematical models shows is that Y-drive actually leads to an  
44 even more female-biased sex ratio (34, 35), because in crosses with X\*Y females, Y-drive  
45 causes the production of less sons and more X\*Y daughters. It was recently proposed that a  
46 solution to this problem evolved in the mandarin vole *L. mandarinus*, whereby the transmission  
47 pattern of male sex chromosomes is consistent with Y-drive in crosses with XX and XX\*  
48 females, and X-drive in crosses with X\*Y females, allowing the three types of females to  
49 produce more sons (11). Overall, the most commonly supported hypothesis is that sex

50 chromosome drive evolved following the establishment of the X\* chromosomes, due to  
51 selection for a balanced sex-ratio. Nevertheless, it was also proposed that the spread of  
52 feminizing mutations could be a consequence, rather than a cause, of the presence of sex  
53 chromosome drive. A first model demonstrated that Y-drive in standard XX/XY systems could  
54 favour the invasion of feminizing chromosomes because they allow to reduce the sex ratio  
55 bias induced by the former (36). More recently, it was also shown that mutant sex determiners  
56 that emerge in tight linkage with a meiotic driver will automatically increase in frequency (a  
57 form of genetic hitchhiking) (37, 38). The first model fits well with the male Y-drive observed  
58 in *D. torquatus*, *A. azarae* and *L. mandarinus*, and the second with the X\*Y female X\*-drive  
59 observed in *M. shisticolor* and *A. azarae*. Thus, there seems to be a clear link between the  
60 evolution of X\* chromosomes and sex chromosome drive in rodents, but their causal  
61 connection remains ambiguous.

62 In an attempt to clarify the situation, we analyzed the transmission ratio of sex  
63 chromosomes in the African pygmy mouse *M. minutoides*. By measuring sex ratio in progenies  
64 from close to 400 litters born in our pygmy mouse laboratory colony, we provide evidence for  
65 the existence of sex chromosome drive in this species: all three types of females produce litters  
66 with significantly more males than expected. Through extensive offspring genotyping, we show  
67 that the sex ratio bias is due to a strong drive of male sex chromosomes. The strength and  
68 direction of drive is dependent on female genotype: males transmit their Y much more often in  
69 crosses with XX and XX\* females and their X more often in crosses with X\*Y females.  
70 Building on existing models, we develop a set of analytical models to shed light on the joint  
71 evolution of male sex chromosome drive and the feminizing X\* chromosome in *M. minutoides*.  
72 The originality of our approach lies in our attention to the consequences and evolution of  
73 conditional drive, whereby the bias in transmission of male X and Y depends on female  
74 genotype. We analyze how the transmission of male sex chromosomes affects the stability of  
75 the X\* chromosome, show that different sequences of events could have led to the evolution of  
76 this atypical system, and finally demonstrate that the conditional nature of drive has a strong  
77 impact on the long-term persistence of the system

## 78 **Results**

### 79 **Sex ratio and sex chromosome transmission**

80 The expected sex ratio in the progenies of the XX, XX\* and X\*Y females, and observed  
81 sex ratio at weaning are shown in table 1. The proportion of males produced was significantly  
82 higher than expected in the three types of crosses. A test of unimodality (39) failed to detect  
83 multimodality in the distribution of mean sex-ratio for each type of female (XX females  
84  $D=0.088$ ,  $p\text{-value}=0.087$ , XX\* females  $D=0.075$ ,  $p\text{-value}=0.071$ , X\*Y females:  $D=0.053$ ,  $p\text{-value}=0.23$ ),  
85 suggesting that all females produce litters with a biased sex ratio, *i.e.*, that the  
86 genetic element(s) skewing sex ratio is (are) fixed in our captive population.

87 It is straightforward that the bias in the sex ratio of the progeny of XX females results  
88 from a biased transmission of male sex chromosomes: there is an average of 79% of males in  
89 their progeny, meaning that males transmit their Y chromosome to roughly 80% of their  
90 offspring (Y-drive). It is less straightforward to determine whether sex ratio biases in the  
91 progenies of XX\* and X\*Y females are due to a skewed transmission of male or female sex  
92 chromosomes (or both). We therefore genotyped all of their offspring (table 2A). The  
93 transmission ratio of sex chromosomes in XX\* and X\*Y females was not significantly different  
94 from 50:50 (table 2B), in contrast to that of males: those paired with XX\* females transmit their  
95 Y to almost 80% of their descendants (like males paired to XX females), and surprisingly, those  
96 paired to X\*Y females transmit their X chromosome more often (X-drive), their Y chromosome  
97 being transmitted to only 36% of their offspring.

## 98 Impact of male sex chromosome drive on the stability of the system

99 To better understand the relation between the evolution and maintenance of the  $X^*$  in  
100 *Mus minutoides* and the sex chromosome drive described in this study, we modeled the  
101 evolutionary dynamics of this system with a set of population genetics models. Our first aim  
102 was to determine the conditions allowing the maintenance of the  $X^*$ , in the light of our new  
103 results. Based on standard stability analysis procedure (40) (see *Appendix A* in Supp. text), we  
104 show that the system is stable as long as the fertility of sex-reversed females ( $w_{X^*Y}$ ,  
105 in number of zygotes produced), exceeds a critical threshold ( $w_{crit}$ ), which value depends on  
106 the transmission ratio of males' Y chromosome in crosses with XX and  $XX^*$  females ( $k$ ) and  
107 with  $X^*Y$  females ( $k^*$ ):

$$w_{X^*Y} > w_{crit} = \frac{(1 - k)^2}{\frac{k}{2} - k^* \left(k - \frac{1}{2}\right)} \quad (1)$$

108 First off, equation (1) reveals that the  $X^*$  is more likely to be maintained for greater  
109 values of  $w_{X^*Y}$ . In the absence of sex chromosome drive ( $k = k^* = 0.5$ ): the  $X^*$  can be  
110 maintained as long as  $X^*Y$  females have a fitness advantage over XX and  $XX^*$  females  
111 ( $w_{X^*Y} > w_{crit} = 1$ ). This result replicates Bengtsson's finding (32), who demonstrated that the  
112 loss of YY embryos does not select against the  $X^*$ : with 1:1 segregation and  $w_{X^*Y} = 1$ ,  $X^*Y$   
113 females produce as many  $X^*$ -bearing offspring as XX females produce daughters, even though  
114 YY are lost. As 2/3 of the offspring of sex-reversed females inherit the  $X^*$ , even the slightest  
115 compensation for the loss ( $w_{X^*Y} > 1$ ), whether it is "automatic" (decreased competition  
116 between surviving embryos) or evolved (*e.g.* increased ovulation rate of  $X^*Y$  females), will  
117 provide a selective advantage to the  $X^*$ . In the presence of drive, the value of  $w_{crit}$  decreases  
118 when  $k$  increases (fig. 1): the more males transmit their Y in crosses with XX and  $XX^*$  females,  
119 the easier is the  $X^*$  maintained. In particular, with Y-drive ( $k > 0.5$ ), the  $X^*$  can be maintained  
120 despite lower relative fertility of  $X^*Y$  females ( $w_{X^*Y} < 1$ ). The reason is two-fold: the  $X^*$  is  
121 advantaged over the X because (i) it resists the drive ( $X^*Y$  females transmit their  $X^*$  and Y  
122 equally), and (ii) it allows to produce more females, the rarer sex in a context of Y-drive (see  
123 *Appendix A* in supp. text). The impact of the transmission ratio of male sex chromosome in  
124 crosses with  $X^*Y$  females ( $k^*$ ) is less crucial, and varies depending on the value of  $k$  (fig. 1):  
125 with  $k > 0.5$  (Y-drive), if  $w_{X^*Y} > 1$ , the system is stable regardless of  $k^*$ , and if  $w_{X^*Y} < 1$ , the  
126 stability is facilitated by small values of  $k^*$ , which result in a decrease in production of the less  
127 fit  $X^*Y$  females (see table 1). With  $k < 0.5$  (X-drive), the  $X^*$  can only be maintained if  $w_{X^*Y} >$   
128 1, and stability is favored by high values of  $k^*$ , which increase the production of the fitter  $X^*Y$   
129 females.

130 Using values of  $k$  and  $k^*$  measured empirically (rounded to 0.8 and 0.36) into equation  
131 (1) provides an estimation of the minimum fertility of  $X^*Y$  females allowing for maintenance  
132 of the polygenic system in the African pygmy mouse:  $w_{X^*Y} > 0.137$  *i.e.*, less than 1/7th of the  
133 fertility of XX and  $XX^*$  females. No estimation of  $w_{X^*Y}$  is available from wild populations, but  
134 knowing that  $X^*Y$  females have a greater reproductive output in laboratory conditions (26), it  
135 is safe to assume that the  $X^*$  is stable in natural conditions in this species, at least in part thanks  
136 to sex chromosome drive.

137 Our model also allows us to estimate the equilibrium frequencies of males and of the  
138 three types of females (Fig. S1; see *Appendix A* in supp. text). With increasing values of  $w_{X^*Y}$ ,  
139 the frequencies of  $XX^*$  and  $X^*Y$  females increase whereas that of XX females and males  
140 decrease. With  $k=0.8$  and  $k^*=0.36$ , the model predicts that population sex ratio would be even

141 for  $w_{X^*Y}=0.57$ , and slightly female-biased for greater values of  $w_{X^*Y}$ . It also predicts that XX  
142 females should be rare, less than 7% for  $w_{X^*Y} > 1$ . This prediction is in line with field  
143 observations: only one out of 20 females captured in Caledon Nature Reserve (where the  
144 founder individuals of our laboratory colony were collected) had a XX genotype (27, and  
145 additional unpublished data).

## 146 **Paths to the evolution of a polygenic sex determination system with conditional sex** 147 **chromosome drive**

148 In this part, we evaluate the plausibility of different scenarios to explain the transition  
149 from a standard XX/XY sex determination system with no sex chromosome drive to a polygenic  
150 sex determination system with conditional drive of male sex chromosomes, as found in the  
151 African pygmy mouse. These scenarios consist of a sequence of events, with several steps  
152 (mutations) necessary to achieve the full transition, as shown on fig. 2. On the left side of fig.  
153 2 are two scenarios in which the X\* appears following the establishment of Y-drive (step a1).  
154 This X\*, in addition to its feminizing effect, either has a direct effect on the transmission ratio  
155 of male sex chromosomes in crosses with X\*Y females (step a2), or not (step a2'). In the latter  
156 case, its spread would have to be followed by the invasion of a drive modifier, affecting the  
157 transmission of male sex chromosomes in crosses with X\*Y females specifically (step 3). On  
158 the right side of fig. 2 are two scenarios in which the X\* emerges in a XX/XY population with  
159 no pre-existent sex chromosome drive. Conditional drive evolves once the feminizing  
160 chromosome is established, either in a single step (step b2), or in two steps: a first “non-  
161 conditional” driver invades, which has the same effect in all crosses (step b2'), followed by a  
162 drive modifier (step 3). For each step in these scenarios, we derived the conditions allowing  
163 for the spread (and fixation when relevant) of a mutant allele leading from one state to the next,  
164 using standard equilibria and stability analyses (40). All models and results are provided in  
165 *Appendix B* in supp. text, and are discussed in more intuitive terms in the following.

166 In brief, we show that the four speculative evolutionary paths are theoretically possible;  
167 for each step, the genomic compartment(s) on which the mutant considered can invade (and go  
168 to fixation when relevant), and conditions under which they can, are shown on fig. 2. In  
169 agreement with models by Kozielska et al. (36), we found that the spread of the feminizing X\*  
170 is facilitated by the presence of a Y-drive in a standard XX/XY system: in the absence of drive,  
171 the X\* can only spread if X\*Y females have a greater fertility than the others ( $w_{X^*Y} > 1$ , step  
172 b1), while if a Y-drive pre-exists, an emergent X\* can spread despite a reduced fertility of X\*Y  
173 females. If the X\*, in addition to its feminizing effect, modifies male sex chromosome drive in  
174 XY x X\*Y crosses (step a2), the condition for spread is  $w_{X^*Y} > w_{crit}$  (the stability condition  
175 discussed in the previous section, eq. (1)), with a critical fertility always smaller than 1 if  $k > 0.5$ .  
176 If the X\* does not affect male sex chromosome drive (step a2'), it will invade the population  
177 for:

$$w_{X^*Y} > \frac{1 - k}{k} \quad (2)$$

178 a simplification of eq. (1), with  $k = k^*$ , also smaller than 1 if  $k > 0.5$  (fig. 1).

179 In contrast, the spread of Y-linked sex chromosome drivers is not facilitated by the presence  
180 of an X\*: a driving-Y will replace a non-driving Y only if it favors its own transmission ( $k > 0.5$ ,  
181 step b2'), the same condition found in populations with standard male heterogametic sex  
182 determination (step a1; (30, 41)). Nevertheless, as shown previously by Bull and Bulmer (34,  
183 42), autosomal alleles favoring the transmission of males' Y chromosome can also be selected  
184 in the presence of the X\*. The reason invoked is that such driving alleles allow males to produce

185 more sons on average, the rarer sex in that context. However, they never explored the fate of  
186 these alleles: can they spread to fixation? With our models, we replicated Bull and Bulmer's  
187 results: a dominant autosomal driver of male sex chromosomes would indeed invade when rare,  
188 under the same conditions as a Y-linked driver ( $k > 0.5$ ). Using deterministic simulations, we  
189 show that the mutant allele would likely stay at a very low frequency, unless the strength of  
190 drive is very mild (fig. S2). For instance, for  $k = 0.8$ , the maximum equilibrium frequency of the  
191 driving allele is less than 0.05, making it unlikely to go to fixation. The reason is that such an  
192 autosomal allele is under conflicting pressures: when it is rare, males produce more sons on  
193 average, via breeding with XX and XX\* females. But as it increases in frequency, so do X\*Y  
194 females, and soon, the advantage of giving birth to more sons in crosses with the first two types  
195 of females is outweighed by the cost of producing more daughters in crosses with X\*Y females.

196 As mentioned earlier, conditional drive could have evolved in a single step (step b2), or in  
197 two steps: first with the spread of a first "non-conditional" driver, followed by the evolution of  
198 a drive modifier affecting male sex chromosome transmission specifically in XY x X\*Y crosses  
199 (step 3). Mechanistically, there are different ways in which a conditional drive can evolve, our  
200 goal was not to be exhaustive and we considered the following scenario. We assumed that the  
201 mutant allele has distinct effects in males and X\*Y females: in males, it causes a sex  
202 chromosome drive of strength  $k$  (e.g. through meiotic drive), in X\*Y females mating with  
203 "driving males", drive becomes  $k^*$  (e.g. through a cryptic choice mechanism interfering with  
204 the fertilizing ability of sperm cells carrying the mutant allele). Interestingly, we show that  
205 different genomic compartments could carry the mutation(s) causing conditional drive. If it  
206 evolves in one step (step b2), the driver could successfully go to fixation if carried by the Y or  
207 an autosome. A rare conditional driver will increase in frequency for  $k > 0.5$ , fixation is possible  
208 in both cases, though the conditions for the fixation of an autosomal sex chromosome driver  
209 are more restrictive (fig. S3). An autosomal driver can only fix if it favors the X in crosses with  
210 X\*Y females ( $k^* < 0.5$ ), as it allows to produce more of the rarer sex (males) and reduces  
211 proportion of YY embryos, which are both beneficial from an autosomal point of view. If it  
212 evolves in two steps, the secondary drive modifier could evolve on any of the three nuclear  
213 compartments found in X\*Y females (step 3): an autosome, the Y or the X\*. If the drive  
214 modifier is autosomal or Y-linked, it goes to fixation assuming it decreases Y-drive ( $k^* < k$ ),  
215 as this reduces the proportion YY embryos produced, and increases the proportion of males. If  
216 X\*-linked, it will fix if  $k^* > k$  when  $w_{X^*Y} > 1$ , as the mutant X\* gains a fitness advantage by  
217 producing more of the fitter X\*Y females, and assuming  $k^* < k$  when  $w_{X^*Y} < 1$ , for opposite  
218 reasons.

### 219 **The long term persistence of the polygenic sex determination system**

220 As long as the system is ecologically stable, the X\* is protected against loss, and so are  
221 the X and Y chromosomes (they are both essential to produce males). As explained by  
222 Maynard-Smith and Stenseth (43), to be stable in an evolutionary sense, the system has to be  
223 able to resist the introduction of genetic modifiers suppressing the feminizing activity of the  
224 X\*. Such suppressors could arise on the Y chromosome or an autosome, and in their presence,  
225 X\*Y individuals would develop as males, which in turn would lead to the production of X\*X\*  
226 females. Ultimately, the spread of a suppressor could theoretically drive the system to revert to  
227 standard male heterogamety, with either X\*X\* females and X\*Y males or XX females and XY  
228 males, following the loss of either the X or X\* chromosome (fig. 3). We used standard stability  
229 analyses to determine the conditions under which the X-X\*-Y system is evolutionary stable in  
230 the presence of conditional male sex chromosome drive, and for conditions under which the  
231 system is unstable, we simulated how the spread of a suppressor influences sex determination.

232 Results are fully detailed and discussed in *Appendix C* in supp. text, and here we describe the  
233 main results.

234 Conditions that allow the spread of a rare suppressor are similar whether it is Y-linked  
235 or autosomal (fig S4-5): a low fertility of X\*Y females (hereafter  $w_{X^*Y \varphi}$ ) and high fertility of  
236 X\*Y males ( $w_{X^*Y \sigma}$ ) (and X\*X\* females ( $w_{X^*X^*}$ ) if it is autosomal, fig S6) will tend to favor  
237 its invasion. Nevertheless, invasion of a suppressor is easier (possible across a greater range of  
238 parameter values) if it is Y-linked. Concerning the impact of male sex chromosome drive: the  
239 strength of drive in crosses with XX and XX\* females ( $k$ ) only has a minor impact on  
240 evolutionary stability, as opposed to the strength of drive in crosses with X\*Y females ( $k^*$ ): the  
241 spread of suppressors is hindered by low values of  $k^*$  and favored by high values (fig S4-5). In  
242 other words, an unconditional Y-drive of male sex chromosomes reduces evolutionary stability  
243 (as opposed to no sex chromosome drive), while a conditional drive such as the one found in  
244 the African pygmy mouse ( $k=0.8$  and  $k^*=0.36$ ), favours stability (fig 4).

245 If the conditions to resist spread of a suppressor are not met, our models show that the  
246 system can either reach a stable alternative polymorphic state, or revert back to male  
247 heterogamety (fig. 3). Alike the conditions for invasion, a suppressor is more likely to cause a  
248 return to male heterogamety if  $w_{X^*Y \varphi}$  is low and  $w_{X^*Y \sigma}$  high, and if it is Y-linked. With a  
249 conditional drive of male sex chromosomes ( $k=0.8$  and  $k^*=0.36$ ), a return to male heterogamety  
250 would only be possible if X\*Y females had a very poor fertility compared to other females:  
251 around  $w_{X^*Y \varphi} = 0.5$  for a Y suppressor and  $w_{X^*Y \varphi} = 0.25$  for an autosomal suppressor (fig.  
252 4A). As X\*Y females in the pygmy mouse have a higher reproductive output than XX and XX\*  
253 females in laboratory conditions (26), it is unlikely that their fertility in the wild would be so  
254 low. This means that if ever a suppressor of X\* activity emerged, it might be able to spread to  
255 an intermediate frequency, but it would not cause a loss of the polygenic sex determination  
256 system. Interestingly, if the drive were unconditional ( $k=k^*=0.8$ , fig. 4B) or inexistent  
257 ( $k=k^*=0.5$ , fig. 4C), the system would be more vulnerable to suppressors: the regions of the  
258 parameter space in which (i) suppressors can invade and (ii) a standard male heterogamety is  
259 restored are larger (*i.e.*, invasion of the suppressor and loss of the X or X\* would be possible  
260 for relatively higher fertilities of X\*Y females and lower fertilities of X\*Y males). These results  
261 suggest that in African pygmy mouse, the polygenic sex determination system is protected by  
262 the conditional drive of male sex chromosomes: it is less likely to be compromised by a  
263 suppressor.

## 264 **Discussion**

265 There is growing evidence that selfish genetic elements are important drivers of  
266 evolutionary innovation (29, 44–50). Sex chromosome drive, and especially Y-drive, is  
267 nevertheless rare, supposedly because of its impact on population sex ratio, which triggers the  
268 evolution of suppressors (27, 29, 51). In this paper, we describe a remarkable system of male  
269 sex chromosome drive in the African pygmy mouse, which direction (X-drive or Y-drive) and  
270 strength depend on the genotype of the male's sexual partner.

271 By combining our empirical findings with mathematical modeling, we demonstrate that  
272 the sex chromosome drive in the African pygmy mouse helps maintaining the feminizing X\*  
273 chromosome, and that the conditional nature of the drive is crucial in limiting the spread of  
274 suppressors of X\* activity: this unusual sex determination system is “locked in” thanks to the  
275 biased transmission of male sex chromosomes. Our models further confirm that the X\* could  
276 have evolved in response to a selfish genetic element biasing the transmission of male sex  
277 chromosomes (*i.e.*, as a mechanism for resistance to drive), in agreement with previous  
278 theoretical work (36, 37). Nevertheless, the X\* could have emerged in the absence of sex  
279 chromosome drive (which would thus have evolved secondarily), provided that X\*Y females  
280 had a greater fertility than XX and XX\* ones at its inception. Although X\*Y females were

281 shown to have a higher reproductive output (26), it is likely that they originally had a poor  
282 fitness (XY females in mammals, including the laboratory mouse, tend to have poor fertility if  
283 not completely sterile (13, 15)). They could have acquired their fitness advantage subsequently,  
284 thanks to a gradual accumulation of female-beneficial genes and alleles on the non-recombining  
285 region of the X\*, as could be expected considering the canonical model of sex chromosomes  
286 evolution (52), and/or on the Y (38). It is also possible that neither sex chromosome drive nor  
287 a greater fecundity of X\*Y females was the initial trigger for the spread of the X\*: some  
288 theoretical models show that interdemic selection (53) or strong inbreeding (54) can favor the  
289 spread of sex-reversal genes. For now, too little is known about the ecology of the African  
290 pygmy mouse (55) to declare if these hypotheses are relevant or not. To go further, it would be  
291 valuable to study other pygmy mice populations. X\*Y females in this species have been found  
292 from Southern up to Western Africa, and the proportion of X\*Y females seems to vary across  
293 localities (56), suggesting sex chromosome drive might differ from one population to another.  
294 Comparing the transmission ratio of male sex chromosomes and breeding success of X\*Y  
295 females in different regions could help further disentangle the cause(s) of the evolution of the  
296 X\* in this species.

297 As mentioned in the introduction, X\*Y females are found in several other mammalian  
298 species, and sex chromosome drive is found in one shape or another in all of them. A conditional  
299 male sex chromosome drive system similar to the one of the African pygmy mouse seems to  
300 exist in the mandarin vole *L. mandarinus* (11). What is remarkable is that the direction and  
301 strength of drive appears to fit with our observations in the African pygmy mouse: the Y was  
302 estimated to be transmitted to close to 80% of offspring in crosses with XX and XX\* females,  
303 while it is transmitted at a rate of around 10% in crosses with X\*Y females (note that  
304 estimations are based on a limited number of genotyped offspring, so they remain to be  
305 confirmed). The conclusions drawn from our mathematical models for *M. minutoides* are  
306 therefore also largely valid for *L. mandarinus*. In those two species, and all other species with  
307 X\*Y females, whether the evolution of sex chromosome drive predates, follows (or even  
308 coincides with) the emergence of the X\* remains to be established, but the recurrent co-  
309 occurrence of the two is clearly puzzling. In standard heterogametic sex determination systems,  
310 sex chromosomes are hot-spots for genomic conflicts because of their peculiar transmission  
311 patterns. The presence of a third sex chromosome increases the number of genomic  
312 compartments that segregate independently and can engage in genomic conflicts, so polygenic  
313 sex determination systems might be more prone to the emergence and spread of sex-  
314 chromosome drivers. Our models and others (32, 57) actually suggest that these systems are  
315 more tolerant towards the invasion of certain types of sex chromosome drivers. For instance, in  
316 standard XX/XY and ZZ/ZW systems, sex-ratio selection tends to favour autosomal loci that  
317 insure a balanced transmission of sex chromosomes, as illustrated by the autosomal suppressors  
318 of sex chromosome drive found in several *Drosophila* species (49, 58, 59). In contrast, in  
319 systems such as the one found in the African pygmy mouse, because the X\* turns certain  
320 genotypic males into females, and therefore biases sex ratio, it might not be in the best interest  
321 of autosomes that sex chromosomes are transmitted equally, as shown by the fact that a Y-  
322 chromosome driver carried by an autosome can be selected under certain circumstances (fig. 2,  
323 steps b2 and b2'). Furthermore, our models show that different genomic compartments could  
324 harbour mutations limiting the transmission of male's Y chromosomes in crosses with X\*Y  
325 females (fig. 2, step 3): autosomes, the X\* and even the Y itself. For autosomes, in addition to  
326 increasing the proportion of males, this is also valuable as it reduces the probability of ending  
327 up in non-viable YY embryos. For the X\*, it is only true if the fertility of X\*Y females is lower  
328 than that of XX\* females, as it increases its chances to be associated with an X chromosome.  
329 Finally, from the Y's perspective, it is also advantageous to increase the transmission of the X



330 at its own expense. Its net transmission ratio (number of viable embryos the Y chromosome  
331 ends up in) is unchanged, as X\*Y females also pass down Y chromosomes, but contrary to  
332 males that transmit their Y exclusively to X\*Y embryos, female pass it down to males only,  
333 providing a fitness advantage in a context of female-biased sex ratio. These findings illustrate  
334 that the interests of different genomic compartments that are usually in conflict over the  
335 transmission of sex chromosomes are modified in the presence of a third sex chromosome, and  
336 that these interests can even align in these specific cases.

337 The conditional nature of the drive in *Mus minutoides* also raises many questions  
338 regarding the underlying proximal mechanism(s). Assuming that the X\* evolved in response to  
339 a Y-chromosome drive, one possibility in line with our analytical results is that in all males, a  
340 selfish element on the Y chromosome promotes its transmission through meiotic drive or by  
341 interfering with maturation of sperm cells harboring the X chromosome, making them  
342 dysfunctional (the most widespread mechanism for chromosome drive (60)). The X-drive  
343 specific to crosses with X\*Y females could have evolved subsequently, and for instance,  
344 females could exercise a cryptic choice to favor fertilization by X-bearing sperms (*i.e.*, by  
345 rendering the genital environment hostile to Y-bearing sperm), or selectively abort “unwanted”  
346 embryos (e.g. through maternal imprinting (11)). As the biased transmission of male sex  
347 chromosomes was identified based on genotyping pups at weaning, a profusion of mechanisms,  
348 ranging from meiotic drive to a differential mortality of embryos or pups bearing paternal X or  
349 Y chromosomes could be responsible for sex chromosome drive. Additional experiments are  
350 therefore necessary to pinpoint the exact mechanism(s) involved. Concerning genetic basis,  
351 most drive system seem to emerge from gene duplication events (49), and can involve massive  
352 gene amplification due to the concurrent evolution of drivers and suppressors of drive. For  
353 instance, one of the most comprehensively described drive system, found in the house mouse,  
354 involves an arms race between the sex-linked multicopy genes *Slx* and *Sly*, found in more than  
355 a hundred copies respectively on the X and Y chromosome (61, 62). Assessing the presence  
356 and copy number of these genes (and other post-meiotically expressed genes) on the three sex  
357 chromosomes of the African pygmy mouse might be a good way to begin investigating the  
358 genetic architecture underlying the conditional drive of in this species. Clearly, rodents with  
359 feminizing X chromosomes are remarkable on many levels. They appear to be particularly  
360 prone to the accumulation of sex chromosome drivers, as illustrated by the conditional drive of  
361 male sex chromosomes of the African pygmy mouse, described in this paper. *Mus minutoides*  
362 and the other mammals with unusual sex determination systems make excellent models to study  
363 genomic conflicts, and in particular the proximal mechanisms and genetic basis of sex  
364 chromosome drive, which are still poorly understood.

365

## 366 ***Materials and Methods***

### 367 **Sex ratio at weaning and sex chromosomes transmission ratios**

368 In June 2010, a breeding colony of *Mus minutoides* was established from animals  
369 caught in Caledon Nature Reserve, South Africa (for full details see references (9, 26)). New  
370 couples were systematically formed after weaning, and breeding was closely monitored.  
371 Progeny sex ratio data was acquired during four consecutive years, from 27, 49 and 73 couples  
372 with respectively XX, XX\* and X\*Y females, for a total of 74, 130 and 194 litters. The number  
373 of males and females in each litter was determined at weaning, the two sexes being  
374 unambiguously told apart based on ano-genital distance and general external genitalia  
375 appearance (25). The sex chromosome complement of females was then assessed by PCR  
376 amplification of the Y-specific *Sry* gene and/or karyotyping; as previously described (9).

377 Sex ratio (defined here as the proportion of males) at weaning was assessed for the  
378 three types of crosses and compared to expected sex ratios under the hypothesis of Mendelian  
379 transmission (0.5 for XX females, 0.25 for the XX\* and 0.33 for the X\*Y) with binomial tests.  
380 The transmission ratio of X and Y chromosomes in males in each type of crosses, and of X and  
381 X\*, and X\* and Y, in respectively XX\* and X\*Y females was measured, and departures from  
382 the expected 50:50 transmission ratio were tested with binomial tests.

### 383 **Theoretical analyses**

384 The mathematical models developed in this study were inspired by models developed to study  
385 sex determination in the lemmings *Myopus schisticolor* and *Dicrostonyx torquatus* (32, 34, 35,  
386 43, 63–65), and adapted to fit *Mus minutoides*' distinctive features. Here we provide the outline  
387 of the model and describe the main procedures. All details can be found in supplementary  
388 material.

389 **The model.** The model is a standard population genetics model, which assumes an infinite  
390 diploid population with random mating and non-overlapping generations: a system of  
391 recurrence equations gives the frequencies of male and female genotypes at each generation,  
392 depending on their frequencies at the previous generation (see *Appendix A* in supp. text). Sex  
393 is determined by a single locus with three alleles (X, X\* and Y), the female determiner X\* is  
394 dominant over the male determiner Y, which itself is dominant over the X. This results in the  
395 production of one type of males (XY; YY males are unviable) and three types of females (XX,  
396 XX\* and X\*Y). In agreement with previous observations showing that XX and XX\* females  
397 have the same reproductive output, different from that of X\*Y females (26), the fertility of XX  
398 and XX\* females is set to 1 in our model, and that of X\*Y females is denoted as  $w_{X*Y}$ . Fertility  
399 in our models controls the number of zygotes produced by a female, so the relative number of  
400 offspring that X\*Y females actually give birth to is calculated by subtracting the relative  
401 number of YY zygotes produced from  $w_{X*Y}$ . This is identical to the very first model built to  
402 study sex determination in the lemmings (32). Finally, to match the empirical results described  
403 in the present paper, the transmission of sex chromosomes is always random in females, and  
404 the ratio of Y chromosomes transmitted by males is conditional upon female genotype. The  
405 strength of distortion (proportion of male Y chromosomes transmitted to the progeny) is  
406 denoted  $k$  in crosses with XX or XX\* females, and  $k^*$  in crosses with X\*Y females.

407 **Stability of the system.** The aim of the stability analysis is to define the parameter space (for  
408 the three parameters  $k$ ,  $k^*$ ,  $w_{X*Y}$ ) that allows the maintenance of the X\* in the general model  
409 described above, provided that no genetic modifiers are introduced (ecological stability *sensu*  
410 Maynard-Smith & Stenseth (43)). Following standard equilibrium analyses described in Otto  
411 and Day 2007(40), we analyzed the eigensystem of the transition matrix associated with the  
412 system of recurrence equations described above. The population converges towards an  
413 equilibrium, which genetic composition, including presence or absence of the X\*, is given by  
414 the eigenvector associated with the highest eigenvalue of the transition matrix (see *Appendix A*  
415 in supp. text for detailed analyses).

416 **Evolutionary scenarios.** Several scenarios, each composed of several steps, are analyzed to  
417 explore how a standard XX/XY sex determination system with Mendelian transmission of sex  
418 chromosomes can evolve into a polygenic sex determination system with conditional male sex  
419 chromosome drive, such as found in the African pygmy mouse (fig. 2). For each possible step,  
420 our aim is to define the conditions that allow going from one state to the next, *i.e.*, that allow  
421 the mutant allele involved in this step to spread when rare. We use equilibria and stability  
422 analyses as described by Otto and Day (40). The exact procedure used depends on whether the  
423 mutant allele considered at a given step arises on the X\*, Y or an autosome. If the mutant is

424 born on the  $X^*$ : the dynamical equations describing the system are linear functions of the  
425 variables (because all males have the same genotype), so the conditions for invasion of the  
426 mutant  $X^*$  can be obtained directly through the study of the eigensystem of the transition matrix  
427 of the system at that step. If the mutant is Y-linked or autosomal, the model consists of a non-  
428 linear combination of multiple variables, because the mutant allele can be found in both males  
429 and females, resulting in multiple genotypes in both sexes. In this case, we first determine the  
430 conditions under which a rare mutant will increase in frequency (invasion conditions), by  
431 performing a stability analysis of the model at the equilibrium where the emergent mutant allele  
432 is absent. This requires studying the Jacobian matrix at the equilibrium point of interest: if its  
433 leading eigenvalue is greater than one, the equilibrium is unstable *i.e.*, a rare mutant will  
434 increase in frequency when rare. However, a successful invasion does not necessarily imply the  
435 loss of the ancestral allele: a mutant allele can spread until it reaches an intermediate frequency,  
436 producing a stable polymorphism. As we are interested in the conditions that allow the mutant  
437 allele to replace the resident allele, we also establish the fixation conditions of the mutant allele,  
438 by performing a stability analysis of the model at the equilibrium where the resident allele is  
439 absent. If all eigenvalues of the Jacobian matrix at that equilibrium are smaller or equal to one,  
440 the equilibrium is stable *i.e.*, a rare ancestral allele would decrease in frequency until it is lost  
441 and the mutant fixed in the population (see *Appendix B in supp. text* for detailed analyses).

442 **Long term persistence of the system.** In this part we define the conditions under  
443 which a suppressor of the feminizing action of the  $X^*$  can evolve and cause the loss of the  
444 polygenic sex determination system. Such a suppressor can arise either on the Y or an autosome,  
445 and results in masculinization of  $X^*Y$  individuals, which produce  $X^*X^*$  daughters when mated  
446 to females that carry an  $X^*$ . This requires extending the general mathematical model by  
447 introducing in our models either a novel allele at the sex-determining locus if the suppressor is  
448 Y-linked, or a novel autosomal locus with two alleles: a wild-type “non-suppressor” allele and  
449 a dominant suppressor allele, which causes  $X^*Y$  individuals to develop as males. As of this  
450 point, relative fertility of  $X^*Y$  females is denoted  $w_{X^*Y\ominus}$ , and two new parameters are added to  
451 the models: (i) the fertility of  $X^*Y$  males ( $w_{X^*Y\♂}$ ), which is relative to the fertility of  $XY$  males,  
452 and that we assume to be smaller or equal to one, as  $X^*Y$  males might bear a cost for carrying  
453 the  $X^*$ , (ii) the relative fertility of  $X^*X^*$  females ( $w_{X^*X^*}$ ), which for simplicity, was either set  
454 to one (same fertility as  $XX$  and  $XX^*$  females) or equal to  $w_{X^*Y\♂}$ . These two cases make the  
455 most sense biologically considering the difference in reproductive success between  $XX$  and  
456  $XX^*$  females versus  $X^*Y$  females. Case (i) is expected if the greater fertility of  $X^*Y$  females  
457 stems from Y-linked genes or alleles, case (ii) if it stems from recessive  $X^*$ -linked alleles. We  
458 decide to consider that males crossed with  $X^*X^*$  females see their Y chromosome transmitted  
459 with a ratio  $k$ , and that carrying the suppressor does not add any fertility cost, in order to avoid  
460 making our models too complex to analyze. We first tried to derive analytical conditions for  
461 stability against each type of suppressor (conditions under which the suppressors cannot invade),  
462 but the complexity of the models precluded obtaining analytical expressions for stability. We  
463 therefore derived them numerically, by replacing parameters by a wide range of numerical  
464 values. Then, we investigated the consequences on sex determination of the spread of the  
465 suppressor (see Fig. 4), by the mean of numerical deterministic simulations. (see *Appendix C*  
466 in supp. text for detailed analyses).

467

468

## 469 References

470 1. J. A. M. Marshall Graves, Sex chromosome specialization and degeneration in

- 471 mammals. *Cell* **124**, 901–14 (2006).
- 472 2. F. Veyrunes, *et al.*, Bird-like sex chromosomes of platypus imply recent origin of  
473 mammal sex chromosomes. *Genome Res.* **18**, 965–73 (2008).
- 474 3. K. Fredga, “Bizarre mammalian sex-determining mechanisms” in *The Differences*  
475 *between the Sexes*, R. V Short, E. Balaban, Eds. (Cambridge University Press, 1994).
- 476 4. J. A. Marshall Graves, Sex chromosomes and sex determination in weird mammals.  
477 *Cytogenet. Genome Res.* **96**, 161–168 (2002).
- 478 5. K. Fredga, A. Gropp, H. Winking, F. Frank, Fertile XX- and XY-type females in the  
479 wood lemming *Myopus schisticolor*. *Nature* **261**, 225–227 (1976).
- 480 6. E. A. Gileva, A contrasted pattern of chromosome evolution in two genera of  
481 lemmings, *Lemmus* and *Dicrostonyx* (Mammalia, Rodentia). *Genetica* **60**, 173–179  
482 (1983).
- 483 7. N. O. Bianchi, C. M. Contreras, The chromosomes of the field mouse *Akodon azarae*  
484 (Cricetidae, Rodentia) with special reference to sex chromosome anomalies.  
485 *Cytogenet. Genome Res.* **6**, 306–313 (1967).
- 486 8. M. I. Ortiz, E. Pinna-Senn, G. Dalmasso, J. A. Lisanti, Chromosomal aspects and  
487 inheritance of the XY female condition in *Akodon azarae* (Rodentia, Sigmodontinae).  
488 *Mamm. Biol.* **74**, 125–129 (2009).
- 489 9. F. Veyrunes, *et al.*, A novel sex determination system in a close relative of the house  
490 mouse. *Proc. R. Soc. B* **277**, 1049–56 (2010).
- 491 10. S. A. Romanenko, *et al.*, Complex Structure of *Lasiopodomys mandarinus*  
492 *vinogradovi* Sex chromosomes, Sex Determination, and Intraspecific Autosomal  
493 Polymorphism. *Genes.* **11**, 374 (2020).
- 494 11. S. W. Roy, On the Form and Origins of the Bizarre Sex Chromosomal System of the  
495 Mandarin Vole. *J. Hered.* **112**, 328–334 (2021).
- 496 12. E. C. Moore, R. B. Roberts, Polygenic sex determination. *Curr. Biol.* **23**, R510-512  
497 (2013).
- 498 13. P. Parma, F. Veyrunes, E. Pailhoux, Sex Reversal in Non-Human Placental Mammals.  
499 *Sex. Dev.* **10**, 326–344 (2016).
- 500 14. P. S. Burgoyne, S. K. Mahadevaiah, J. M. A. Turner, The consequences of asynapsis  
501 for mammalian meiosis. *Nat. Rev. Genet.* **10**, 207–216 (2009).
- 502 15. N. Vernet, *et al.*, The expression of Y-linked Zfy2 in XY mouse oocytes leads to  
503 frequent meiosis 2 defects, a high incidence of subsequent early cleavage stage arrest  
504 and infertility. *Development* **141**, 855–66 (2014).
- 505 16. J. M. Cloutier, S. K. Mahadevaiah, E. Ellnati, A. Tóth, J. Turner, Mammalian meiotic  
506 silencing exhibits sexually dimorphic features. *Chromosoma* **125**, 215–226 (2016).
- 507 17. F. Baudat, B. De Massy, F. Veyrunes, Sex chromosome quadrivalents in oocytes of  
508 the African pygmy mouse *Mus minutoides* that harbors non-conventional sex  
509 chromosomes. *Chromosoma* (2019) <https://doi.org/10.1007/s00412-019-00699-4>.
- 510 18. E. a Gileva, V. B. Fedorov, Sex ratio, XY females and absence of inbreeding in a  
511 population of the Wood Lemming, *Myopus schisticolor* Lilljeborg, 1844. *Heredity.* **66**,  
512 351–355 (1991).
- 513 19. N. O. Bianchi, *Akodon* sex reversed females: the never ending story. *Cytogenet.*  
514 *Genome Res.* **96**, 497–501 (2002).

- 515 20. E. A. Gileva, I. E. Benenson, L. A. Konopistseva, V. F. Puchkov, I. A. Makaranets,  
516 XO Females in the Varying Lemming , *Dicrostonyx torquatus* : Reproductive  
517 Performance and its Evolutionary Significance. *Evolution*. **36**, 601–609 (1982).
- 518 21. M. S. Lizarralde, N. O. Bianchi, M. S. Merani, Cytogenetics of South American  
519 Akodont Rodents ( Cricetidae ). VII. Origin of sex chromosome polymorphism in  
520 *Akodon azarae*. *Cytologia*. **47**, 183–193 (1982).
- 521 22. M. B. Espinosa, A. D. Vitullo, Offspring sex-ratio and reproductive performance in  
522 heterogametic females of the South American field mouse *Akodon azarae*. *Hereditas*  
523 **124**, 57–62 (1996).
- 524 23. S. Bondrup-Nielsen, S. Ims, R. Fredriksson, K. Fredga, “Demography of the wood  
525 lemming (*Myopus schisticolor*).” in *The Biology of Lemmings*, (Academic Press,  
526 London, UK, 1993), pp. 493–508.
- 527 24. K. Fredga, L. Setterfield, U. Mittwoch, Gonadal development and birth weight in X\*X  
528 and X\*Y females of the wood lemming, *Myopus schisticolor*. *Cytogenet. Cell Genet.*  
529 **91**, 97–101 (2000).
- 530 25. M. Rahmoun, *et al.*, Anatomical and molecular analyses of XY ovaries from the  
531 African pygmy mouse *Mus minutoides*. *Sex. Dev.* **8**, 356–63 (2014).
- 532 26. P. A. Saunders, *et al.*, XY females do better than the XX in the African pygmy mouse,  
533 *Mus minutoides*. *Evolution*. **68**, 2119–27 (2014).
- 534 27. A. Burt, R. Trivers, *Genes in conflict: the biology of selfish genetic elements* (Harvard  
535 University Press, 2006).
- 536 28. L. Sandler, E. Novitski, Meiotic Drive as an Evolutionary Force. *Am. Nat.* **91**, 105–  
537 110 (1957).
- 538 29. Q. Helleu, P. R. Gérard, C. Montchamp-Moreau, Sex chromosome drive. *Cold Spring*  
539 *Harb. Perspect. Biol.* **7** (2015).
- 540 30. W. D. Hamilton, Extraordinary Sex Ratios. *Science*. **156**, 477–488 (1967).
- 541 31. H. E. Hoekstra, J. M. Hoekstra, An Unusual Sex-Determination System in South  
542 American Field Mice (Genus *Akodon*): the Role of Mutation, Selection, and Meiotic  
543 Drive in Maintaining XY Females. *Evolution*. **55**, 190–197 (2001).
- 544 32. B. O. Bengtsson, “Evolution of the sex ratio in the wood lemming, *Myopus*  
545 *schisticolor*.” in *Measuring Selection in Natural Populations*, T. M. Fenchel, F. B.  
546 Christiansen, Eds. (Springer-Verlag, 1977), pp. 333–343.
- 547 33. E. A. Gileva, Meiotic drive in the sex chromosome system of the varying lemming ,  
548 *Dicrostonyx torquatus* Pall. (Rodentia, Microtinae). *Heredity*. **59**, 383–389 (1987).
- 549 34. J. J. Bull, M. G. Bulmer, The evolution of XY females in mammals. *Heredity*. **47**,  
550 347–65 (1981).
- 551 35. M. Bulmer, Sex ratio evolution in Lemmings. *Heredity*. **61**, 231–233 (1988).
- 552 36. M. Kozielska, F. J. Weissing, L. W. Beukeboom, I. Pen, Segregation distortion and the  
553 evolution of sex-determining mechanisms. *Heredity*. **104**, 100–112 (2010).
- 554 37. F. Ubeda, M. M. Patten, G. Wild, U. Francisco, On the origin of sex chromosomes  
555 from meiotic drive. *Proc. R. Soc. B* **282**, 20141932 (2015).
- 556 38. M. F. Scott, M. M. Osmond, S. P. Otto, Haploid selection, sex ratio bias, and  
557 transitions between sex-determining systems. *PLoS Biol.* **16**, e2005609 (2018).
- 558 39. J. Hartigan, P. Hartigan, The dip test of unimodality. *Ann. Stat.* **13**, 70–84 (1985).

- 559 40. S. P. Otto, T. Day, *A Biologist's Guide to Mathematical Modeling in Ecology and*  
560 *Evolution* (Princeton University Press, 2007) [https://doi.org/10.1088/1751-](https://doi.org/10.1088/1751-8113/44/8/085201)  
561 8113/44/8/085201.
- 562 41. R. A. Fisher, *The Genetical Theory of Natural Selection* (Oxford University Press,  
563 1930) (April 17, 2014).
- 564 42. K. Fredga, M. Bulmer, Aberrant chromosomal sex-determining mechanisms in  
565 mammals, with special reference to species with XY females. *Phil. Trans. R. Soc.*  
566 *Lond. B* **322**, 83–95 (1988).
- 567 43. J. Maynard Smith, N. C. Stenseth, On The Evolutionary Stability Of The Female-  
568 Biased Sex-Ratio In The Wood Lemming (*Myopus schisticolor*): The Effect Of  
569 Inbreeding. *Heredity (Edinb)*. **41**, 205–214 (1978).
- 570 44. G. D. Hurst, J. H. Werren, The Role of Selfish Genetic Elements in Eukaryotic  
571 Evolution. *Nat. Rev. Genet.* **2**, 597–606 (2001).
- 572 45. J. H. Werren, Selfish genetic elements, genetic conflict, and evolutionary innovation.  
573 *PNAS* **108**, 10863–70 (2011).
- 574 46. W. R. Rice, Nothing in Genetics Makes Sense Except in Light of Genomic Conflict.  
575 *Annu. Rev. Ecol. Evol. Syst.* **44**, 217–237 (2013).
- 576 47. T. A. R. Price, D. J. Hodgson, Z. Lewis, G. D. D. Hurst, N. Wedell, Selfish genetic  
577 elements promote polyandry in a fly. *Science*. **322**, 1241–1243 (2008).
- 578 48. S. Billiard, *et al.*, Selfish male-determining element favors the transition from  
579 hermaphroditism to androdioecy. *Evolution*. **69**, 683–693 (2015).
- 580 49. C. Courret, C. H. Chang, K. H. C. Wei, C. Montchamp-Moreau, A. M. Larracuenté,  
581 Meiotic drive mechanisms: Lessons from *Drosophila*. *Proc. R. Soc. B Biol. Sci.* **286**  
582 (2019).
- 583 50. A. K. Lindholm, *et al.*, The Ecology and Evolutionary Dynamics of Meiotic Drive.  
584 *Trends Ecol. Evol.* **31**, 315–326 (2016).
- 585 51. J. Jaenike, Sex Chromosome Meiotic Drive. *Annu. Rev. Ecol. Sys.* **32**, 25–49 (2001).
- 586 52. D. Bachtrog, A dynamic view of sex chromosome evolution. *Curr. Opin. Genet. Dev.*  
587 **16**, 578–585 (2006).
- 588 53. S. Vuilleumier, R. Lande, J. J. M. Van Alphen, O. Seehausen, Invasion and fixation of  
589 sex-reversal genes. *J. Evol. Biol.* **20**, 913–920 (2007).
- 590 54. N. C. Stenseth, Is the female biased sex ratio in wood lemming *Myopus schisticolor*  
591 maintained by cyclic inbreeding? *Oikos* **30**, 83–89 (1978).
- 592 55. J. Britton-Davidian, T. J. Robinson, F. Veyrunes, Systematics and evolution of the  
593 African pygmy mice, subgenus *Nannomys*: a review. *Acta Oecol.* **42**, 41–49 (2012).
- 594 56. F. Veyrunes, J. Perez, S. N. C. Paintsil, E. Fichet-Calvet, J. Britton-Davidian, Insights  
595 into the evolutionary history of the X-Linked sex reversal mutation in *Mus minutoides*:  
596 clues from sequence analyses of the Y-linked *Sry* gene. *Sex. Dev.* **7**, 244–52 (2013).
- 597 57. M. G. Bulmer, J. J. Bull, Models of Polygenic Sex Determination and Sex Ratio  
598 Control. *Evolution*. **36**, 13–26 (1982).
- 599 58. A. B. De Carvalho, L. B. Klaczko, Autosomal suppressors of sex-ratio in *Drosophila*  
600 *mediopuncta*. *Heredity*. **71**, 546–551 (1993).
- 601 59. M. Cazemajor, C. Landré, C. Montchamp-Moreau, The Sex-Ratio Trait in *Drosophila*  
602 *simulans*: Genetic Analysis of Distortion and Suppression. *Genetics* **147**, 635–42

- 603 (1997).
- 604 60. D. R. Taylor, P. K. Ingvarsson, Common features of segregation distortion in plants  
605 and animals. *Genetica* **117**, 27–35 (2003).
- 606 61. C. Moretti, *et al.*, Battle of the sex chromosomes: Competition between X and Y  
607 chromosome-encoded proteins for partner interaction and chromatin occupancy drives  
608 multicopy gene expression and evolution in muroid rodents. *Mol. Biol. Evol.* **37**,  
609 3453–3468 (2020).
- 610 62. J. Cocquet, *et al.*, A genetic basis for a postmeiotic X versus Y chromosome  
611 intragenomic conflict in the mouse. *PLoS Genet.* **8**, e1002900 (2012).
- 612 63. M. G. Bulmer, P. D. Taylor, Sex ratio under the haystack model. *J. Theor. Biol.* **86**,  
613 83–9 (1980).
- 614 64. A. D. Carothers, Population dynamics and the evolution of sex-determination in  
615 lemmings. *Genet. Res.* **36**, 199–209 (1980).
- 616 65. I. E. Benenson, On the maintenance of the unique system of sex determination in  
617 Lemmings. *Oikos* **41**, 211–218 (1983).

618

### 619 *Acknowledgements*

620 This study was supported by the French National Research Agency (ANR grant  
621 “SEXYMUS”, No. 10-JCJC-1605), and the Del Duca Foundation from Institut de France  
622 (“Subvention scientifique 2012”). The experimental protocol was performed in accordance  
623 with European guidelines and with the approval of the Ethical Committee on animal care and  
624 use of France (N° CEEA-LR-12170). We thank the animal breeding facility of the University  
625 of Montpellier (CECEMA), M. Perriat-Sanguinet for his help in maintaining the breeding  
626 colony, and Sally Otto for valuable discussions.

627 **Figures and tables**

628

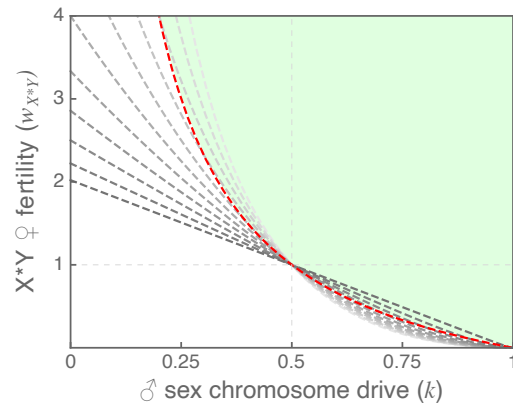

629

630 **Figure 1. Stability of the polygenic sex determination system.** The dashed lines represent  
631  $w_{crit}$ , the critical fertility value for X\*Y female above which the X\* chromosome can be  
632 maintained (see equation (1)), as a function of  $k$ , the transmission ratio of male sex  
633 chromosomes in crosses with XX and XX\* females. The different curves show  $w_{crit}$  for  
634 different values of  $k^*$  (transmission ratio of male sex chromosomes in crosses with X\*Y  
635 females), ranging from 0 to 1 (gray to black scale, 0.1 increment). The red curve is  $w_{crit}$  for  
636  $k=k^*$  (unconditional drive), the green area depicts the parameter space in which the X\* is  
637 maintained.



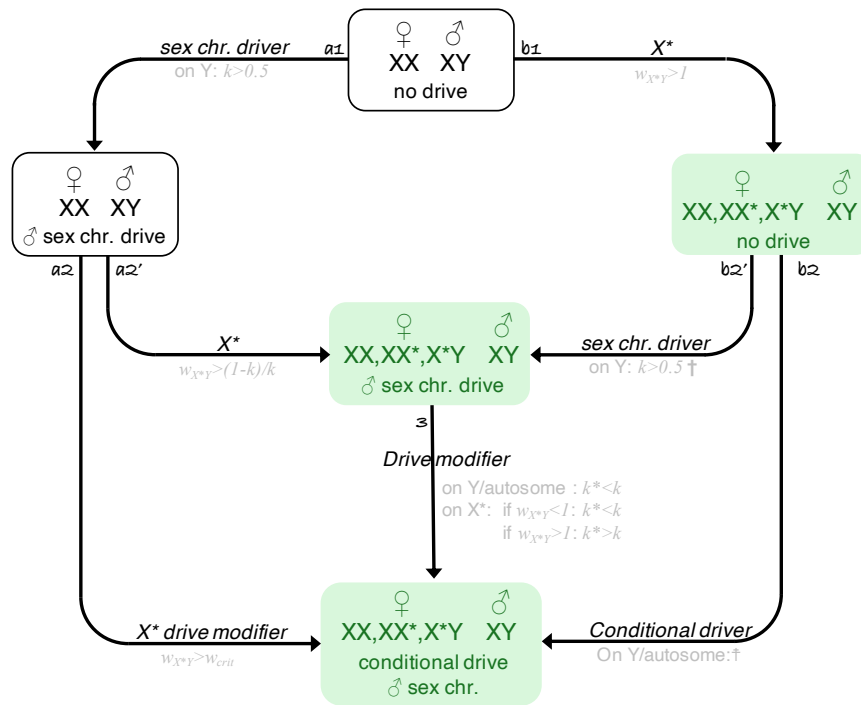

638

639 **Figure 2. Evolutionary scenarios for the transition from standard male**  
 640 **heterogametic system with no sex chromosome drive to a polygenic sex**  
 641 **determination system with conditional drive of male sex chromosomes.** Each  
 642 square represents a state along the transition, green shaded squares are states at which  
 643 the  $X^*$  is present. Arrows indicate the type of mutation involved in the step between two  
 644 states, along with the genomic compartment on which the mutant has to be for a  
 645 successful invasion as well as the condition allowing invasion and fixation when  
 646 relevant. †: if autosomal, a sex chromosome driver will increase in frequency when rare  
 647 for  $k > 0.5$ , but will stay at low frequency across most of  $k$ ,  $k^*$  and  $w_{X^*Y}$  parameter space  
 648 considered in the models (see fig. S2). ‡: a Y-linked or autosomal conditional driver will  
 649 spread when rare for  $k > 0.5$ , but might stay at an intermediate frequency, depending on  
 650 the values of  $k$ ,  $k^*$  and  $w_{X^*Y}$  (see fig. S3).

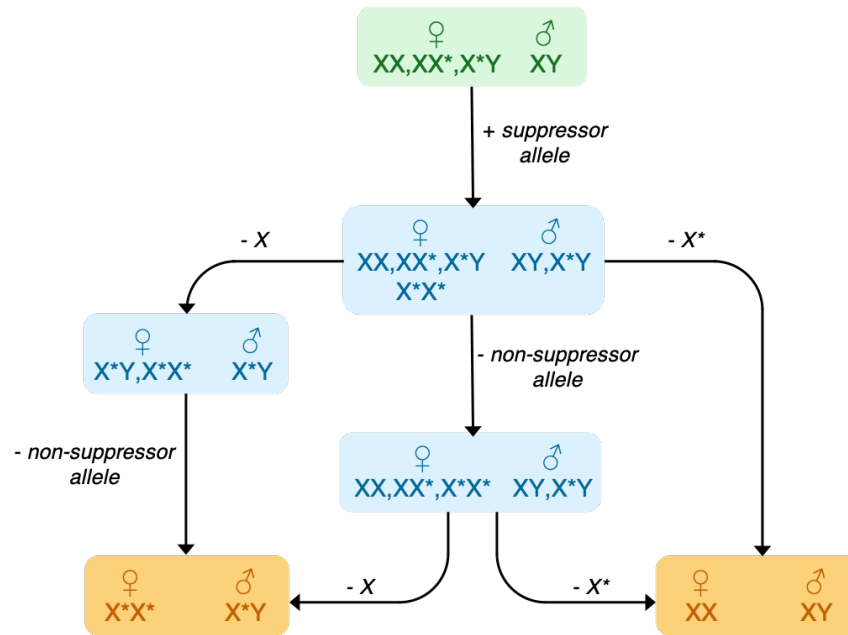

651

652 **Figure 3. Paths leading to heterogamety following the spread of a suppressor of the**  
 653 **feminizing activity of the X\*.** Worth for both a Y-linked or autosomal suppressor. Each  
 654 square represents a putative equilibrium state, and color indicates the condition of sex  
 655 determination: green: polygenic sex determination currently found in the African pygmy  
 656 mouse, blue: “alternative” polygenic sex determination, orange: male heterogamety. Arrows  
 657 leading from one state to the next indicate which allele is lost (-) or gained (+)  
 658 between two states. Following the spread of suppressor, several “alternative” stable polygenic state, at  
 659 which more than two sexual genotypes persist in at least one of the two sexes, could be  
 660 reached: first, if polymorphism is maintained at the suppressor locus in the presence of X, X\*  
 661 and Y sex chromosomes, four types of females (XX, XX\*, X\*Y and X\*X\*) and two type of  
 662 males (XY and X\*Y) co-exist. Second, if the suppressor allele goes to fixation, but the three  
 663 sex chromosomes are maintained at equilibrium, a system with XX, XX\* and X\*X\* females  
 664 and XY and X\*Y males can be established. Finally, the loss of the X chromosome would  
 665 result in a polygenic system with X\*Y and X\*X\* females and X\*Y males. Reaching a  
 666 X\*X\*/X\*Y male heterogametic system requires the loss of the X and fixation of suppressor  
 667 allele, and reaching a XX/XY system is achieved following the loss of the X\* (even if the  
 668 suppressor locus remains polymorphic).

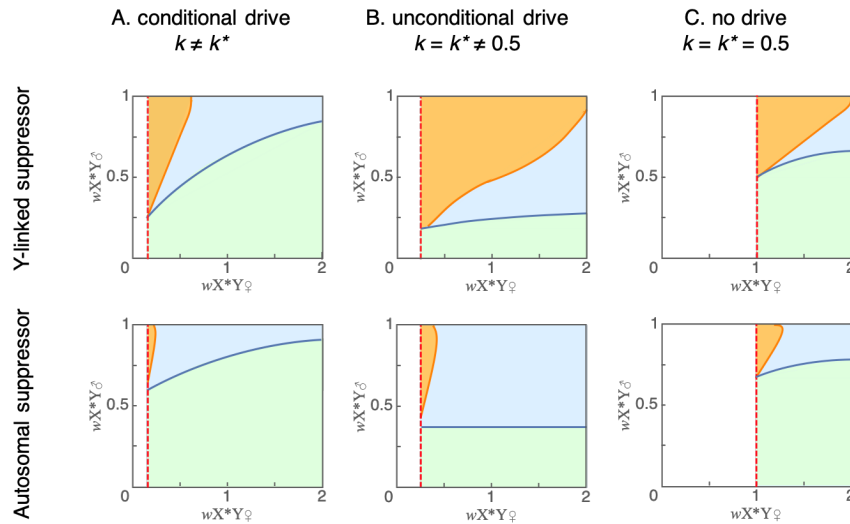

669

670 **Figure 4. Evolutionary outcomes in the presence of a suppressor of the feminizing**  
 671 **activity of the X\***, as a function of the fertility of X\*Y females and X\*Y males (fertility of  
 672 X\*X\* females fixed to one). The suppressor is either Y-linked (top row) or autosomal  
 673 (bottom row), with either (A) conditional drive of male sex chromosomes ( $k=0.8$  and  
 674  $k^*=0.36$ ), (B) unconditional drive of male sex chromosomes ( $k=k^*=0.8$ ) and (C) no drive of  
 675 sex chromosomes ( $k=k^*=0.5$ ). We delineated three regions in the parameter space that  
 676 correspond to qualitatively different evolutionary outcomes of the introduction of a  
 677 suppressor (see fig. 3). In the green areas, the system is stable against its invasion. In the blue  
 678 areas, a rare suppressor can spread but does not cause a return to a standard male  
 679 heterogametic sex determination. In the orange areas, a suppressor will spread and cause a  
 680 return to male heterogamety (XX/XY or X\*X\*/X\*Y). The boundaries shown are numerically  
 681 predicted representations based on the analytical models and deterministic simulations  
 682 presented in Appendix C. The red dashed line shows the threshold for maintenance of the X\*,  
 683 which depends only on the relative fertility of X\*Y females (see equation 1).

684 **Table 1. Expected vs. observed sex ratio in the progenies of the three types of females.**

| Female genotype                                      | XX                     | XX*                    | X*Y                    |
|------------------------------------------------------|------------------------|------------------------|------------------------|
| Expected sex ratio                                   | 0.5                    | 0.25 <sup>1</sup>      | 0.33 <sup>1</sup>      |
| Observed sex ratio<br>(overall number of offspring)  | 0.79 +/- 0.13<br>(206) | 0.37 +/- 0.17<br>(370) | 0.42 +/- 0.14<br>(670) |
| Departure from expected sex ratio<br>(Binomial test) | p=<2.2e-16             | p=1.967e-07            | p=6.701e-05            |

685 <sup>1</sup>The expected sex ratio in the progenies of XX\* and X\*Y females is different from 0.5  
686 because they produce viable offspring of respectively four genotypes (XX, XX\*, X\*Y and  
687 XY) and three genotypes (XX\*, X\*Y, XY).

688 **Table 2. Transmission ratios of sex chromosomes.** A: results of genotyping, number of  
 689 each type of offspring in the progeny of the three types of crosses. B. Transmission ratios of  
 690 sex chromosomes.

691 **A.**

| Female genotype |   | XX  | XX* |     | X*Y |     |
|-----------------|---|-----|-----|-----|-----|-----|
| Sex chromosomes |   | X   | X   | X*  | X*  | Y   |
| <b>Males</b>    | X | 43  | 37  | 52  | 248 | 283 |
|                 | Y | 163 | 135 | 146 | 139 | †   |

692

693 **B.**

|                                     | transmission ratio                     | p-value (binomial test) |
|-------------------------------------|----------------------------------------|-------------------------|
| Males with XX females               | <b>Y: 0.791</b> (95% CI: 0.730-0.845)  | <b>&lt;2.2e-16</b>      |
| Males with XX* females              | <b>Y: 0.760</b> (95% CI: 0.712-0.802)  | <b>&lt;2.2e-16</b>      |
| Males with X*Y females <sup>1</sup> | <b>Y: 0.359</b> (95% CI: 0.311-0.409)  | <b>3.28e-08</b>         |
| XX* females                         | <b>X: 0.465</b> (95% CI: 0.413-0.517)  | 0.19                    |
| X*Y females <sup>1</sup>            | <b>X*: 0.467</b> (95% CI: 0.434-0.511) | 0.14                    |

694 <sup>1</sup>As X\*Y females produce lethal YY embryos, to determine the transmission ratio of  
 695 sex chromosomes of males and females involved in these crosses, we compared only  
 696 the proportion of XX\* vs. X\*Y offspring (248 vs. 139) and XX\* vs. XY offspring  
 697 (248 vs. 283) respectively.
